# Supplementary material for: Cortisol awakening response and diurnal cortisol among children at elevated risk for schizophrenia: Relationship to psychosocial stress and cognition
Source: PubMed Central journal article supplement — Psychoneuroendocrinology. 2014 Aug;46(100):1–13. doi: 10.1016/j.psyneuen.2014.03.010 (PMC4065330; doi:10.1016/j.psyneuen.2014.03.010), 2014-08
Supplement: mmc1.pdf [file mmc1.pdf]

**Supplementary Table 1. Memory and executive function measures**

| Neurocognitive measure and subtest         | Test description                                                                                                   |
|--------------------------------------------|--------------------------------------------------------------------------------------------------------------------|
| <b>Memory: WRAML2 subtests</b>             |                                                                                                                    |
| Number-letter                              | Repeating strings of numbers and letters presented orally                                                          |
| Verbal memory index                        |                                                                                                                    |
| Story memory                               | Immediate recall of two short stories presented orally                                                             |
| Verbal learning                            | Immediate free recall of a list of words presented orally                                                          |
| Visual memory index                        |                                                                                                                    |
| Design memory                              | Drawing five visually-presented geometric designs                                                                  |
| Picture memory                             | Identifying differences between four similar pairs of pictures                                                     |
| Verbal working memory                      | Immediate recall of word lists by category (animal vs. non-animal)                                                 |
| <b>Executive function: D-KEFS subtests</b> |                                                                                                                    |
| Verbal fluency test                        |                                                                                                                    |
| Letter fluency                             | Generating words beginning with F, A, and S within 60 s                                                            |
| Category fluency                           | Generating items from categories (animals and boys names) within 60 s                                              |
| Category switching                         | Generating words from alternate categories (fruit and furniture) within 60 s                                       |
| Colour-word interference test              |                                                                                                                    |
| Inhibition                                 | Naming the ink colour of colour-words presented in contrasting coloured ink                                        |
| Inhibition/switching                       | Alternating between the Inhibition condition described above and naming the colour-word whilst ignoring ink colour |
| Towers test                                |                                                                                                                    |
| Towers test total achievement              | Building towers using one to five disks in the fewest possible moves                                               |

Notes. WRAML2: Wide Range Assessment of Memory and Learning 2nd Edition; D-KEFS:

Delis–Kaplan Executive Function System.
